# Supplementary material for: Characterization of pruned tea branch biochar and the mechanisms underlying its adsorption for cadmium in aqueous solution
Source: Royal Society of Chemistry journal article supplement (doi:10.1039/d1ra04235a), 2021-01-01
Supplement: d1ra04235a1.pdf [file d1ra04235a1.pdf]

## Supplementary material

### Characterization of pruned tea branch biochar and the mechanisms underlying its adsorption for cadmium in aqueous solution

Chuan Han,<sup>a</sup> Miaofei Wang,<sup>a</sup> Yanfang Ren,<sup>\*ab</sup> Liming Zhang,<sup>a</sup> Yu Ji,<sup>a</sup> Wenjia Zhu,<sup>a</sup>

Yaping Song,<sup>a</sup> Junyu He<sup>\*ab</sup>

---

\* Corresponding author. Tel.: +86-519-8633-0086; Fax: +86-519-8633-0086;

E-mail address: [junyuhe0303@126.com](mailto:junyuhe0303@126.com) (J. He); [yanfangren@126.com](mailto:yanfangren@126.com) (Y. Ren)

<sup>a</sup> School of Environmental and Safety Engineering, Changzhou University, Jiangsu 213164, PR China

<sup>b</sup> Jiangsu Petrochemical Safety and Environmental Engineering Research Center, Changzhou, 213164, PR China

### Text S1. Adsorption kinetics

The pseudo-first-order model is expressed as Eq. (A1):

$$\ln(Q_e - Q_t) = \ln Q_e - k_1 t \quad (\text{A. 1})$$

Where  $Q_e$  and  $Q_t$  are the adsorption capacity of  $\text{Cd}^{2+}$  (mg/g) at equilibrium and time  $t$  (min), respectively;  $k_1$  ( $\text{min}^{-1}$ ) is the rate constant of the pseudo-first-order adsorption. The constraints ( $Q_0=0$ ;  $t_0=0$ ) have been correctly applied to this model.<sup>1</sup>

The pseudo-second-order model is shown as Eq. (A2):

$$\frac{t}{Q_t} = \frac{1}{k_2 \cdot Q_e^2} + \frac{t}{Q_e} \quad (\text{A. 2})$$

Where  $k_2$  ( $\text{g}/(\text{mg} \cdot \text{min})$ ) represents the rate constant of the pseudo-second-order adsorption.

The other adsorption model is Elovich kinetic, which is shown as Eq. (A3):

$$Q_t = \frac{1}{\beta} \ln(1 + \alpha \beta t) \quad (\text{A. 3})$$

Where  $\alpha$  ( $\text{mg}/(\text{mg} \cdot \text{min})$ ) is the rate constant of initial adsorption, and  $\beta$  is the desorption constant related to the adsorbent surface coverage and chemical adsorption activation energy.

## Text S2. Adsorption isotherms

The Langmuir isotherm model proposes that adsorption is localized on a monolayer, adsorption sites are homogeneous while no interaction happens between adsorbate molecules. This model in linear can be expressed by Eq. (A4):

$$\frac{C_e}{Q_e} = \frac{C_e}{Q_{max}} + \frac{1}{Q_{max}K_L} \quad (\text{A. 4})$$

Where  $Q_{max}$  is the maximum adsorption capacity (mg/g);  $K_L$  (L/mg) is the Langmuir constant related to the adsorption energy;  $C_e$  (mg/L) are the  $\text{Cd}^{2+}$  concentrations after adsorption.

Freundlich isotherm assumes that the adsorption is monolayer and reversible, while it can be used for multilayer adsorption occurs on heterogeneous surface. It can be described in linear form as follow Eq. (A5):

$$\ln Q_e = \ln k_F + \frac{1}{n} \ln C_e \quad (\text{A. 5})$$

Where  $K_F$  (mg/g) and  $n$  are Freundlich constants.

The Tempkin isotherm model supposes that the adsorption heat of absorbent decreases linearly with the of increase surface coverage. Uniform distribution of the binding energy is one of the features in this model. The linear form of the Temkin isotherm can be expressed by Eq. (A6):

$$Q_e = B \ln k_t + B \ln C_e \quad (\text{A. 6})$$

Where  $K_t$  is the equilibrium binding constant, and  $B$  is related to the heat of adsorption.

**Table S1.** Analysis of mineral composition of various sources

| Various sources | Mineral composition (%) |      |      |      |      |      |
|-----------------|-------------------------|------|------|------|------|------|
|                 | P                       | K    | Ca   | Na   | Mg   | Fe   |
| TB              | 0.02                    | 0.94 | 1.12 | 0.11 | 0.85 | 0.04 |
| TBB400          | 0.03                    | 2.87 | 1.64 | 0.28 | 1.09 | 0.14 |
| TBB500          | 0.04                    | 3.16 | 1.99 | 0.34 | 1.29 | 0.18 |
| TBB600          | 0.04                    | 3.24 | 2.43 | 0.38 | 1.40 | 0.22 |
| TBB700          | 0.06                    | 3.37 | 2.65 | 0.43 | 1.43 | 0.28 |
| TBB800          | 0.07                    | 3.55 | 2.82 | 0.45 | 1.44 | 0.30 |

References

1. S. Brandani. *Adsorption.*, 2021, **27**, 353-368.
